# Supplementary material for: Feasibility, Acceptability, and Adoption of Digital Fingerprinting During Contact Investigation for Tuberculosis in Kampala, Uganda: A Parallel-Convergent Mixed-Methods Analysis
Source: PubMed Central journal article supplement (PMC6265600; doi:10.2196/11541), 2018-11-15
Supplement: jmir_v20i11e11541_app3.pdf [file jmir_v20i11e11541_app3.pdf]

Multimedia Appendix 3: Index Patient Results

Figure A1: Flow diagram showing enrollment and digital fingerprinting of index patients

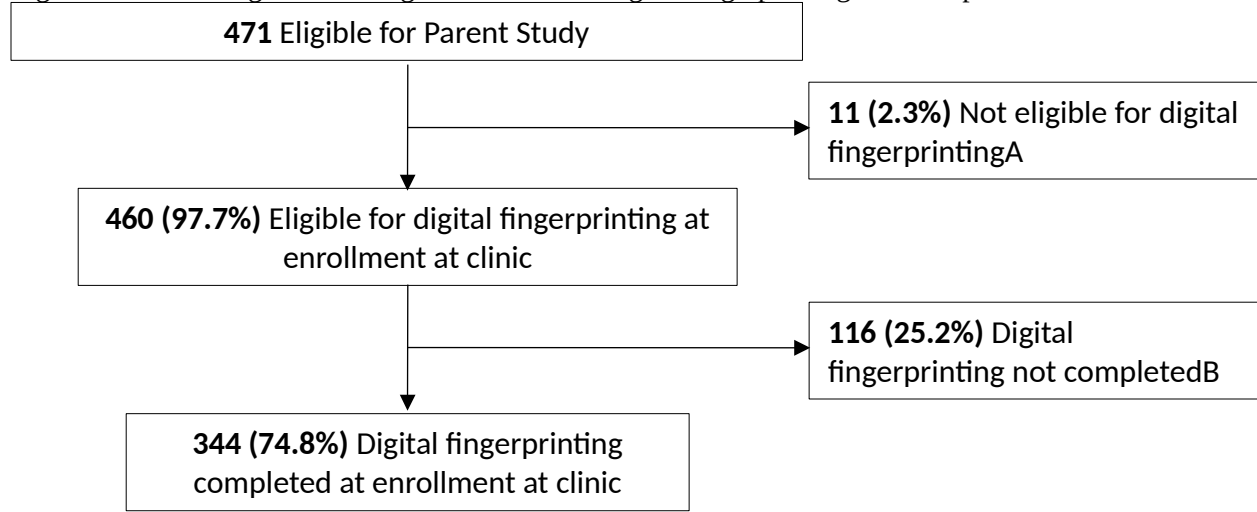

<sup>A</sup> Children under the age of 5 were not eligible for digital fingerprinting.

<sup>B</sup> 64 (55.2%) fingerprint scan failures were classified as software problems, 47 (40.5%) as hardware problems, and 5 (4.3%) as unclassified problems.

Table A1: Characteristics of index patients

| Characteristic<br>n (%)        | Digital Fingerprint<br>(n=344) | No Digital Fingerprint<br>(n=116) | P-value <sup>A,B</sup> |
|--------------------------------|--------------------------------|-----------------------------------|------------------------|
| Age                            |                                |                                   |                        |
| Children 5-14 years            | 10 (2.9)                       | 3 (2.6)                           | .86                    |
| Adults 15 and older            | 334 (97.1)                     | 113 (97.4)                        |                        |
| Sex (%)                        |                                |                                   |                        |
| Female                         | 144 (41.9)                     | 51 (44.0)                         | .69                    |
| Male                           | 200 (58.2)                     | 65 (56.0)                         |                        |
| Proportion living with HIV (%) |                                |                                   |                        |
| Positive                       | 218 (63.4)                     | 74 (63.8)                         | .94                    |
| Negative or Unknown            | 126 (36.6)                     | 42 (36.2)                         |                        |

<sup>A</sup> Chi square test of significance used

<sup>B</sup> P-values were not adjusted for clustering by CHW, as clustering was found to be modest (ICC=0.22)
